# Supplementary material for: Glucose Availability and AMP-Activated Protein Kinase Link Energy Metabolism and Innate Immunity in the Bovine Endometrium
Source: PubMed Central journal article supplement (PMC4790959; doi:10.1371/journal.pone.0151416), 2016-03-14
Supplement: pone.0151416.s002.pdf [file pone.0151416.s002.pdf]

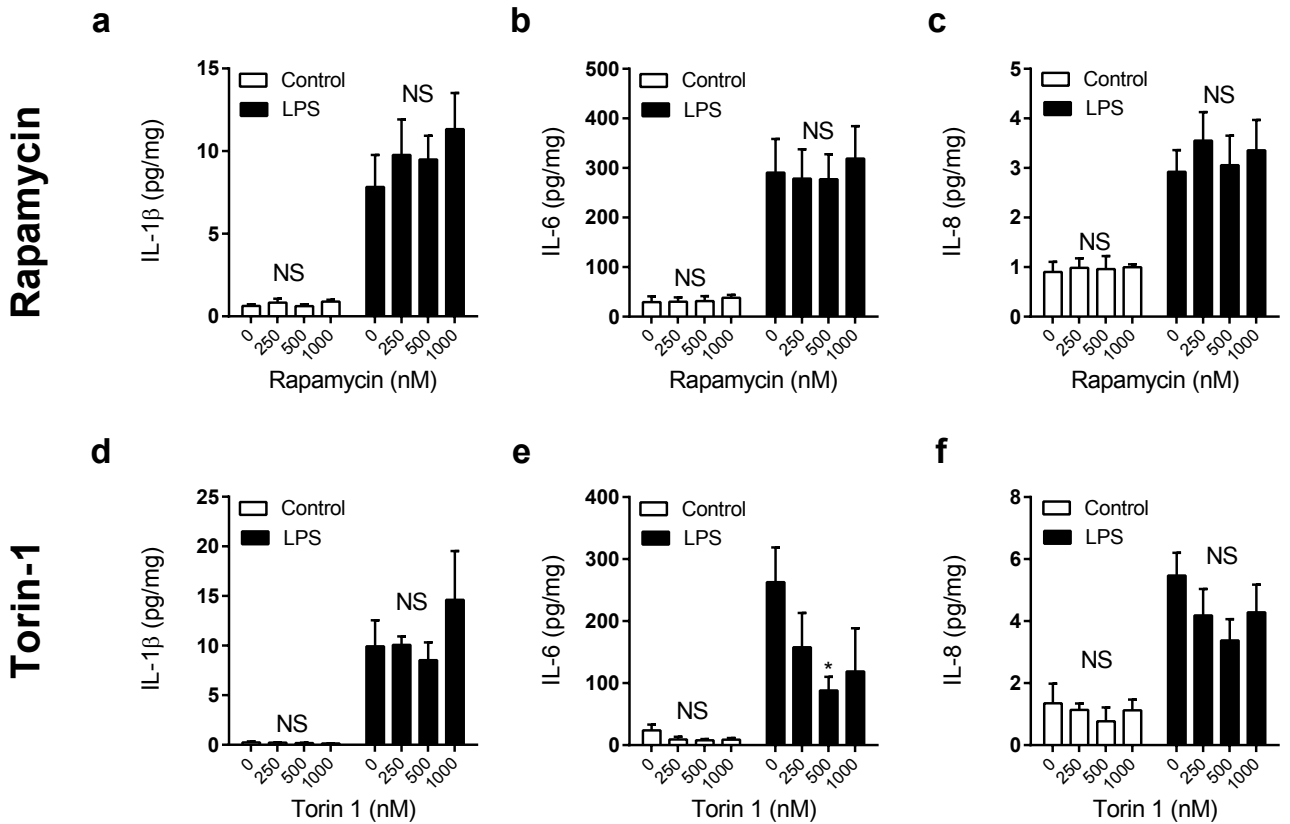

*Ex vivo* organ cultures of endometrium were cultured in media containing 1.8 mg/organ glucose with (a-c) rapamycin or (d-f) torin-1 (0, 250, 500, 1000 nM) for 6 h followed by medium containing control vehicle or 100 ng/ml LPS for 24 h. At the end of the experiment organ weights were recorded, and the accumulation of IL-1 $\beta$  (a, d), IL-6 (b, e) and IL-8 (c, f) was measured in supernatants. Data are presented as mean concentration per mg tissue + SEM from 4 independent experiments. Data are presented as mean concentration per mg tissue + SEM from 4 independent experiments, and analyzed by ANOVA using Dunnett's multiple comparisons test to compare with vehicle (0), within each treatment group; \* P < 0.05, NS = ANOVA not significant.
